Schuster A.<sup>1</sup>; Lange T.<sup>1</sup>; Backhaus S.J.<sup>1</sup>; Strohmeier C.<sup>1</sup>; Boom P.<sup>1</sup>; Matz J.<sup>1</sup>; Kowallick J.T.<sup>2</sup>; Steinmetz M.<sup>3</sup>; Kutty S.<sup>4</sup>; Bigalke B.<sup>5</sup>; Desch S.<sup>6</sup>; Hasenfuss G.<sup>1</sup>; Thiele H.<sup>6</sup>; Stiermaier T.<sup>7</sup>; Eitel J.<sup>7</sup>

<sup>7</sup>University Heart Center, Medical Clinic II (Cardiology/Angiology/Intensive Care Medicine), Luebeck, Germany

**Conclusions:** User independent volumetric analyses performed by fully automated software are feasible and results are equally predictive of MACE compared with conventional analyses in patients following myocardial infarction.
